# Supplementary material for: Optimizing the composition of LaF3:Yb,Tm upconverting nanoparticles synthesised by the co-precipitation method to improve the emission intensity
Source: Royal Society of Chemistry journal article supplement (doi:10.1039/d4nr03096f), 2024-01-01
Supplement: d4nr03096f1.pdf [file d4nr03096f1.pdf]

## Supplementary Information

### Optimizing the composition of LaF<sub>3</sub>:Yb,Tm upconverting nanoparticles synthesised by co-precipitation method to improve the emission intensity

Borbála Tegze<sup>1</sup>, Gyula Tolnai<sup>2</sup>, Emőke Albert<sup>1</sup>, Dóra Hessz<sup>1,3</sup>, Miklós Kubinyi<sup>1</sup>, János Madarász<sup>4</sup>, Zoltán May<sup>5</sup>, Dániel Olasz<sup>6,7</sup>, György Sáfrán<sup>6</sup>, Zoltán Hórvölgyi<sup>1,\*</sup>

<sup>1</sup> Department of Physical Chemistry and Materials Science, Budapest University of Technology and Economics, H-1111, Műegyetem rkp. 3., Budapest, Hungary

\*e-mail: horvolgyi.zoltan@vbk.bme.hu

<sup>2</sup> Holikem Kft, H-1082, Kisfaludy utca 40, Budapest, Hungary

<sup>3</sup> MTA-BME Lendület Quantum Chemistry Research Group, Műegyetem rkp. 3., H-1111 Budapest, Hungary

<sup>4</sup> Department of Inorganic and Analytical Chemistry, Budapest University of Technology and Economics, H-1111, Műegyetem rkp. 3., Budapest, Hungary

<sup>5</sup> HUN-REN Research Centre for Natural Sciences, Institute of Materials and Environmental Chemistry, H-1117 Magyar tudósok körútja 2., Budapest, Hungary

<sup>6</sup> Institute for Technical Physics and Materials Science, HUN-REN Centre for Energy Research, Konkoly-Thege M. út 29-33, H-1121, Budapest, Hungary

<sup>7</sup> Department of Materials Physics, Eötvös Loránd University, Pázmány Péter sétány 1/A, H-1117, Budapest, Hungary

## Synthesis of nanoparticles

**Table S1:** Amounts of rare earth metal ion solutions used in the synthesis for the different composition of  $\text{La}_{(1-x-y)}\text{Yb}_x\text{Tm}_y\text{F}_3$  nanoparticles.

In case of 100% conversion rate the maximum yield of doped  $\text{LaF}_3$  material was 2.00 g.

| x   | y   | 1 M $\text{La}^{3+}$ solution<br>[ml] | 50 mM $\text{Yb}^{3+}$ solution<br>[ml] | 5 mM $\text{Tm}^{3+}$ solution<br>[ml] |
|-----|-----|---------------------------------------|-----------------------------------------|----------------------------------------|
| 1.0 | 0.1 | 10.10                                 | 2.04                                    | 2.04                                   |
| 2.0 | 0.1 | 9.99                                  | 4.08                                    | 2.04                                   |
| 3.0 | 0.1 | 9.89                                  | 6.13                                    | 2.04                                   |
| 4.0 | 0.1 | 9.79                                  | 8.17                                    | 2.04                                   |
| 5.0 | 0.1 | 9.69                                  | 10.20                                   | 2.04                                   |
| 6.0 | 0.1 | 9.59                                  | 12.26                                   | 2.04                                   |

## TEM-EDS analysis of the nanoparticles

TEM-EDS analysis was carried out on the  $\text{LaF}_3$ : 1-6 mol% Yb, 0.1 mol% Tm upconverting nanoparticles heat treated at 400 °C. (The EDS elemental maps of the samples were measured, however, the low amounts of ytterbium and thulium present in the samples, and their partially overlapping peaks in the EDS spectra, in addition with the significant carbonization of the samples, caused the elemental maps to be unreliable. Instead of the elemental maps, the composition of the particles was determined using the TEM EDS measurement taken from a larger area of the sample.) An example EDS spectrum can be seen in Figure A1. The spectra showed the highest peaks belonging to La, F, C and O, showing that it was mainly made of  $\text{LaF}_3$ , and the sample contained some organic pollutants. The low intensity Cu and Mo peaks appearing in the spectra can be attributed to the background due to the sample grid and sample holder. Low intensity peaks also showed the presence of the doping ions, Tm and Yb, although it should be noted that the Tm and Yb peaks partially overlap, making the determination of their exact concentration difficult. Very small Na and Si peaks also appear on the spectra, which might come from pollutants and synthesis by-products that can be present in the sample in small amounts.

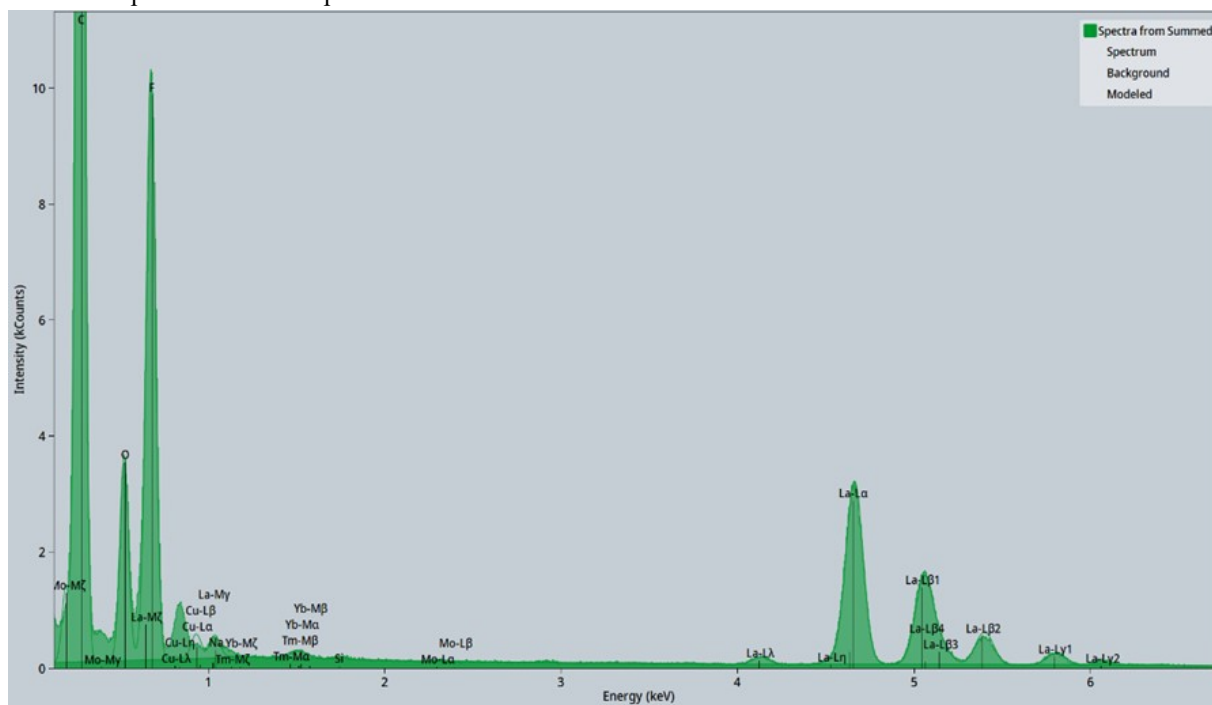

**Fig. S1:** TEM EDS spectrum of  $\text{LaF}_3$ : 1 mol% Yb, 0.1 mol% Tm sample heat treated at 400 °C

## Upconversion emission measurements

### *Emission spectra of heat treated samples*

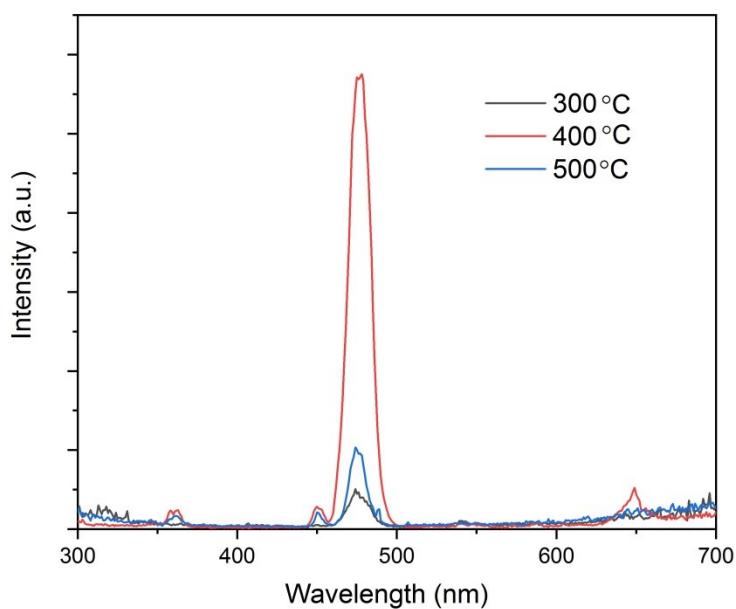

**Fig. S2:** Upconversion emission spectra of LaF<sub>3</sub>: 2 mol% Yb, 0.1 mol% Tm sample heat treated at different temperatures (excitation wavelength: 980 nm; laser power: 1.49 W)

### *Laser power dependent emission spectra*

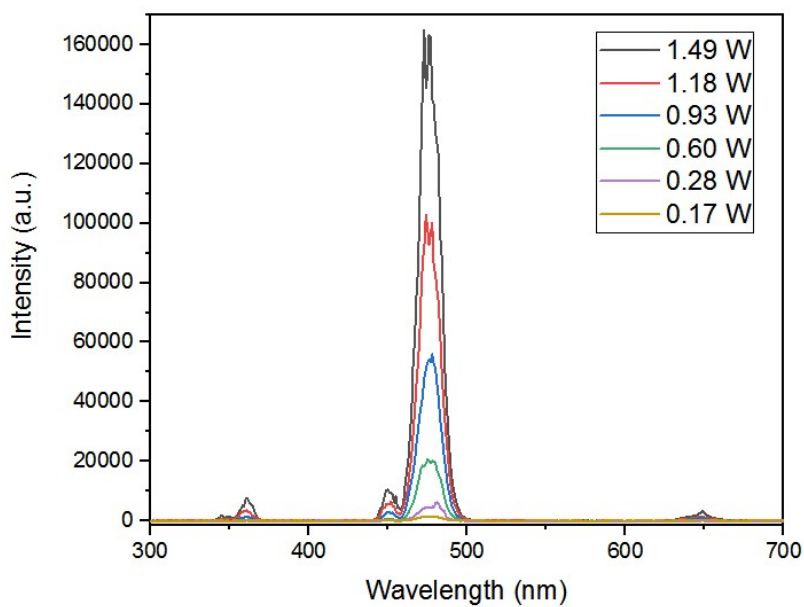

**Fig. S3** Laser power dependence of the upconversion emission spectra of LaF<sub>3</sub>: 3 mol% Yb, 0.1 mol% Tm sample

### XRD measurements on samples before and after heat treatment

Fig S4. shows the XRD patterns of  $\text{LaF}_3$ : 4% Yb, 0.1% Tm nanoparticles before heat treatment and after heat treatments at different temperatures. The peaks that can be attributed to hexagonal  $\text{LaF}_3$  structure (PDF-00-032-0483) appeared in all samples. The XRD pattern of the sample heat treated at 300 °C showed peaks similar in shape and intensity to those of the as-prepared sample, while the samples treated at 400 and 500 °C showed peaks with increasingly higher intensity and a narrower shape, suggesting higher crystallinity. The sample heat treated at 500 °C showed new peaks appearing (noted with an asterisk in Fig S4), which do not belong to the hexagonal  $\text{LaF}_3$  structure. Based on the results published our previous paper [B. Tegze, G. Tolnai, D. Hessz, M. Kubinyi, J. Madarász, G. Sáfrán and Z. Hórvölgyi, *J. Therm. Anal. Calorim.*, 2023, 148, 10795–10802], it can be assumed that this is caused by crystalline by-products (e.g. YbOF and YbOOH) forming at this higher temperature, which can also contribute to the lowered emission intensity of samples heat treated above 400 C.

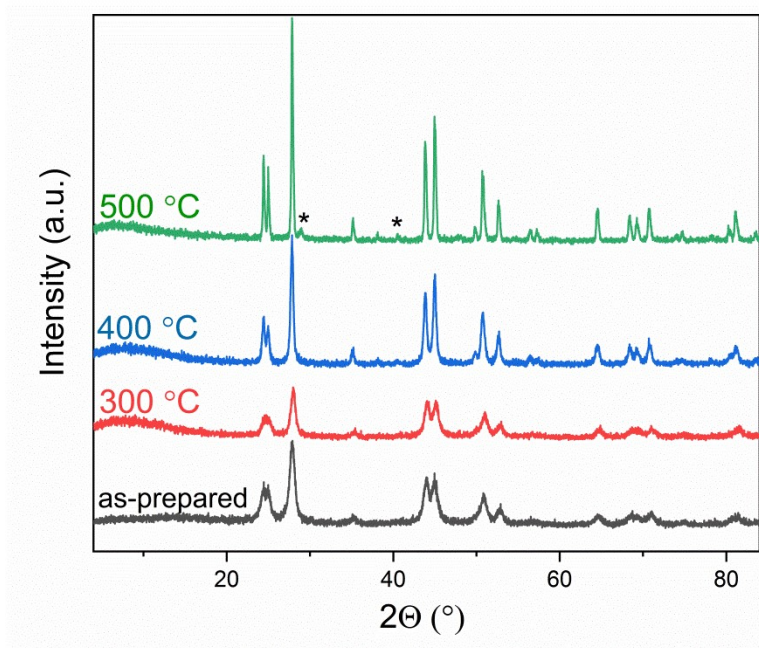

**Fig. S4** XRD patterns of the  $\text{LaF}_3$ : 4% Yb, 0.1% Tm sample before heat treatment (as-prepared), and after heat treatment at different temperatures (300-500 °C, for 2 h in each case)
